# Supplementary material for: Biochemical &amp; phytochemical insights of geographically diverse Acacia nilotica through HPLC–MS-based untargeted metabolomic studies
Source: Research Square preprint supplement (doi:10.21203/rs.3.rs-8084390/v1), 2025-12-03
Supplement: Supplementary file 1 [file 44fbb30d43138c5f59659b44.docx]

**Spl. Table 1: Soil type and agro-climatic conditions of different collection points of Northern Indian states.**

| **State** | **Collection point** | **Soil type** | **pH** | **EC (dSm-1)** | **N*** | **P*** | **K*** |
| --- | --- | --- | --- | --- | --- | --- | --- |
| Rajasthan | Bikaner | sandy to clay loam | 8.3 | 0.29 | 188 | 756 | 83.6 |
| Punjab | Amritsar | Coarse loamy | 6.9 | 0.95 | 219 | 816 | 99.7 |
| Himachal Pradesh | Palampur | Loam to clay | 6.7 | 0.52 | 192 | 782 | 86.4 |

* in (ppm).

**Spl. Table 2: Metrological data and environmental variables of each collection point.**

| **State** | **Collection point** | **Annual Temp.**  **(°C)** | **Max. Temp. (°C)** | **Min. Temp. (°C)** | **Annual Rainfall (mm)** | **Annual Sunlight (Hrs. )** | **Avg. Relative Humidity (%)** |
| --- | --- | --- | --- | --- | --- | --- | --- |
| Rajasthan | Bikaner | 30.2 | 18.1 | 44.2 | 300.2 | 3842.77 | 42 |
| Punjab | Amritsar | 23.4 | 13.5 | 23.4 | 572.2 | 3653.84 | 53 |
| Himachal Pradesh | Palampur | 16.4 | 07.6 | 12.9 | 1288.3 | 3327.35 | 54 |

Data of IMF: India Meteorological Department (Ministry of Earth Sciences)

**Spl. Table 3: Phytochemical analysis of different ANL extracts.**

| **Extract** | **Presence/Absence of various class of phytochemicals** | | | | | |
| --- | --- | --- | --- | --- | --- | --- |
| **Phenolics** | **Flavonoids** | **Alkaloids** | **Tannins** | **Saponins** | **Coumarins** |
| RJB | ++ | ++ | ++ | ++ | + | ++ |
| PBB | +++ | + | ++ | ++ | ++ | ++ |
| HPB | ++ | + | ++ | ++ | + | + |

**Spl. Table 4: Total number of molecular features detected in ANL samples for [M+H] + & [M-H] - mode of HPLC-MS.**

| **Extracts** | **Molecular features detected** | | |
| --- | --- | --- | --- |
| **[M+H] +** | **[M-H] -** | **Total** |
| RJB | 1491 | 1190 | 2681 |
| PBB | 1682 | 1033 | 2715 |
| HPB | 1876 | 1061 | 2937 |

**Spl. Table 5: Inhibition of different microorganisms by ANL samples in agar disk diffusion screening assay.**

| **Microorganism and**  **Positive control** | **Concentration**  **(µg/ml)** | **Average zone of inhibition (mm ±SEM)** | | | |
| --- | --- | --- | --- | --- | --- |
| **Positive Control** | **RJB** | **PBB** | **HPB** |
| *P. aeruginosa* | 125 | NA | 1.38 ± 0.16 | 1.26 ± 0.11 | 1.35 ± 0.08 |
| 250 | 1.65 ± 0.24 | 1.79 ± 0.17 | 1.86 ± 0.13 |
| 500 | 2.11 ± 0.12 | 2.43 ± 0.21 | 2.61 ± 0.17 |
| Ciproﬂoxacin | 5μg/ml | 12.1 | NA | | |
| *S. aureus* | 125 | NA | 1.59 ± 0.15 | 1.63 ± 0.11 | 1.92 ± 0.06 |
| 250 | 1.86 ± 0.17 | 1.96 ± 0.11 | 2.16 ± 0.09 |
| 500 | 2.41± 0.19 | 2.76 ± 0.14 | 2.89 ± 0.14 |
| Ampicillin | 10μg/ml | 13.4 | NA | | |
| *S. pyogenes* | 125 | NA | 1.22 ± 0.14 | 1.09 ± 0.09 | 1.29 ± 0.12 |
| 250 | 1.73 ± 0.12 | 1.88 ± 0.10 | 2.37 ± 0.18 |
| 500 | 2.63 ± 0.17 | 2.71 ± 0.16 | 2.97 ± 0.22 |
| Ampicillin | 10μg/ml | 13.6 | NA | | |
| *C. albicans* | 125 | NA | 1.42 ± 0.14 | 1.54 ± 0.13 | 1.57 ± 0.07 |
| 250 | 1.95 ± 0.16 | 2.37 ± 0.15 | 2.68 ± 0.15 |
| 500 | 2.83 ± 0.17 | 2.96 ± 0.19 | 3.11 ± 0.21 |
| Fluconazole | 25μg/ml | 10.7 | NA | | |
