# Supplementary material for: Biochemical &amp; phytochemical insights of geographically diverse Acacia nilotica through HPLC–MS-based untargeted metabolomic studies
Source: Research Square preprint supplement (doi:10.21203/rs.3.rs-8084390/v1), 2025-12-03
Supplement: Supplementary file 2 [file b27df764c536337690079ad7.docx]

| **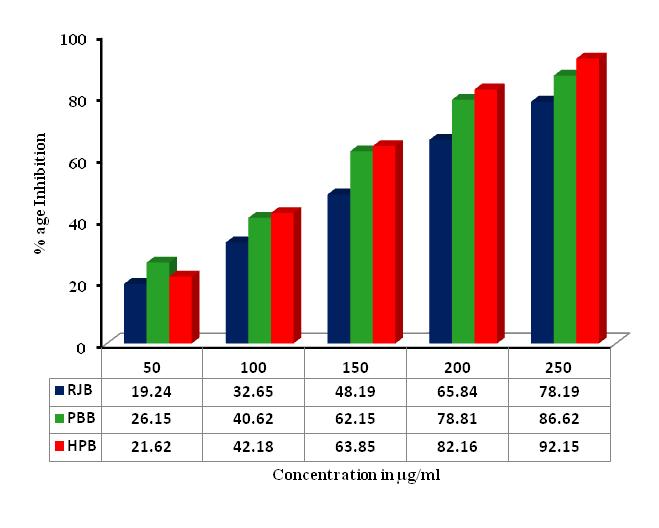** | **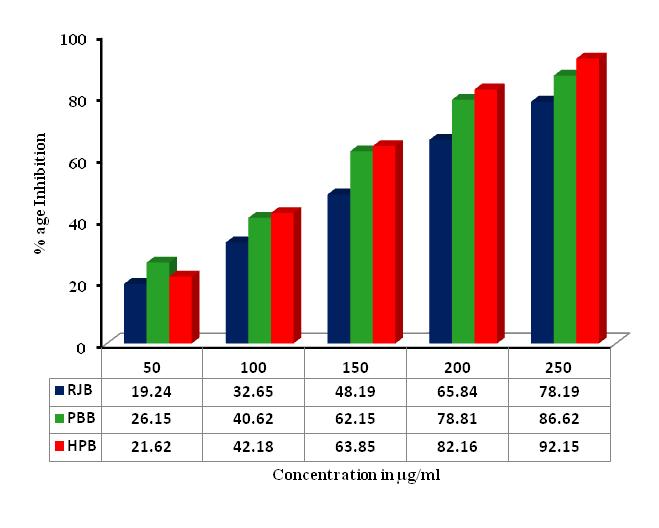** |
| --- | --- |
| **Spl. Figure 1:** DPPH radical scavenging potential of various ANL extracts of diverse geographical locations. | **Spl. Figure 2:** Site specific hydroxyl radical scavenging potential of various ANL extracts of diverse geographical locations. |
| **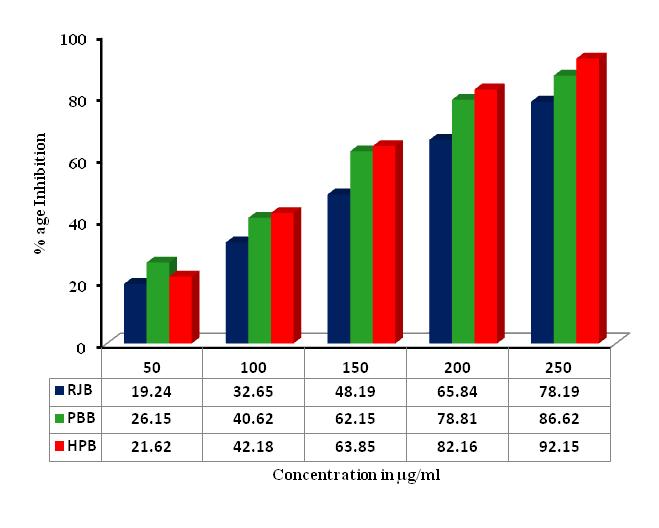** | **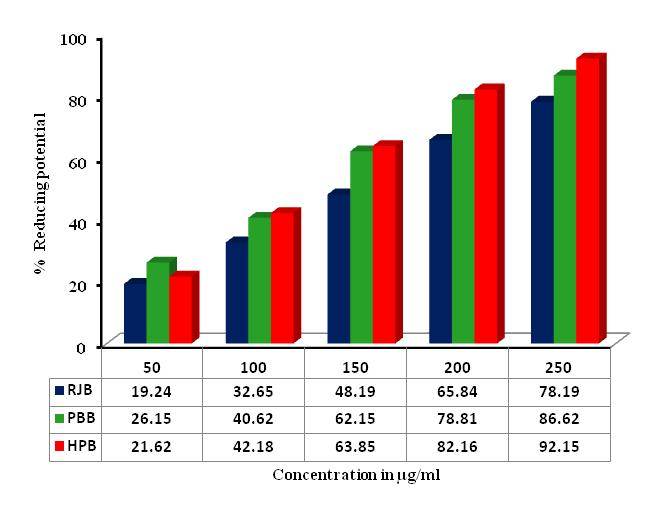** |
| **Spl. Figure 3:** Non-site specific hydroxyl radical scavenging potential of various ANL extracts of diverse geographical locations. | **Spl. Figure 4:** Reducing potential of various ANL extracts of diverse geographical locations. |
| **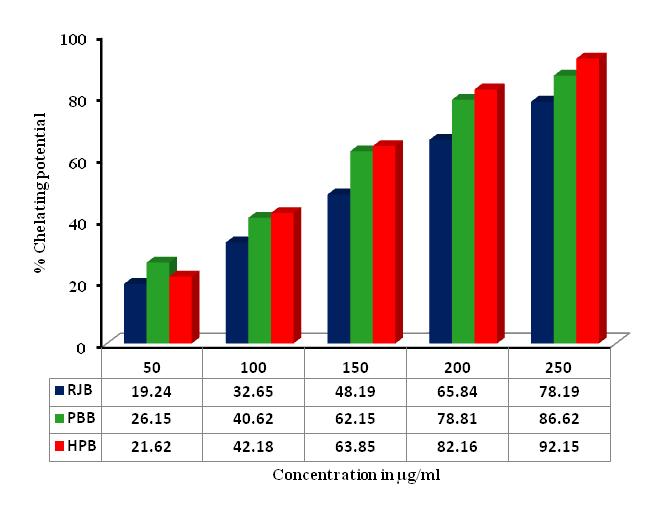** | **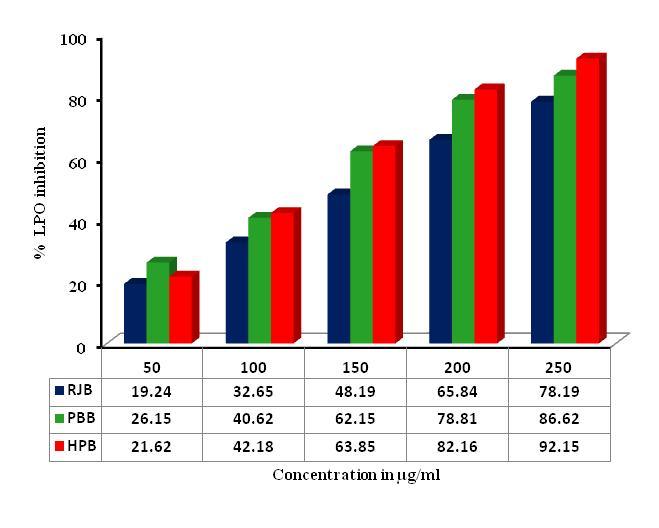** |
| **Spl. Figure 5:** Chelating potential of various ANL extracts of diverse geographical locations. | **Spl. Figure 6:** Lipid peroxidation inhibition of various ANL extracts of diverse geographical locations. |
